# Supplementary material for: Antimicrobial Activity of Hybrid Nanomaterials Based on Star and Linear Polymers of N,N′-Dimethylaminoethyl Methacrylate with In Situ Produced Silver Nanoparticles
Source: MDPI journal article supplement (doi:10.3390/ma13133037), 2020-07-07
Supplement: s1 [file s1]

# Supplementary Materials: Antimicrobial activity of hybrid nanomaterials based on star and linear polymers of N,N'-dimethylaminoethyl methacrylate with in situ produced silver nanoparticles.

Paulina Teper <sup>1</sup>, Anna Sotirova <sup>2</sup>, Violeta Mitova <sup>3</sup>, Natalia Oleszko-Torbus <sup>1</sup>, Alicja Utrata-Wesołek <sup>1</sup>, Neli Koseva <sup>3</sup>, Agnieszka Kowalczyk <sup>1</sup> and Barbara Mendrek <sup>1,\*</sup>

<sup>1</sup> Centre of Polymer and Carbon Materials, Polish Academy of Sciences, M. Curie-Skłodowskiej 34, 41-819 Zabrze, Poland; pteper@cmpw-pan.edu.pl (P.T.), noleszko@cmpw-pan.edu.pl (N.O.-T.), autrata@cmpw-pan.edu.pl (A.U.-W.), akowalczyk@cmpw-pan.edu.pl (A.K.)

<sup>2</sup> Stephan Angeloff Institute of Microbiology, Bulgarian Academy of Sciences, Georgi Bonchev Str. 26, 1113 Sofia, Bulgaria; anna@microbio.bas.bg (A.S.)

<sup>3</sup> Institute of Polymers, Bulgarian Academy of Sciences, Georgi Bonchev Str. Bl. 103A, 1113 Sofia, Bulgaria; mitova@polymer.bas.bg (V.M.), koseva@polymer.bas.bg (N.K.)

\* Correspondence: bmendrek@cmpw-pan.edu.pl; +48-32-271-60

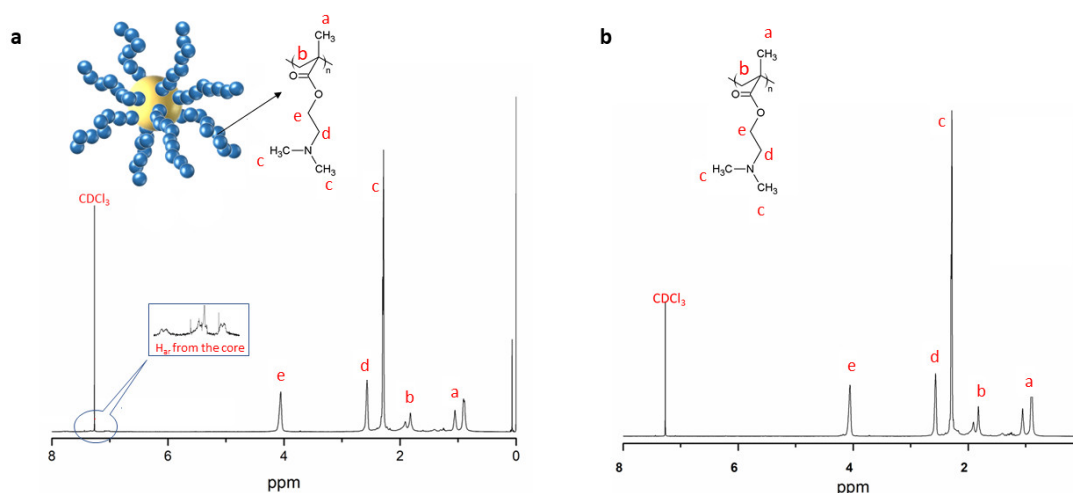

**Figure S1.** <sup>1</sup>H NMR spectra of (a) star PDMAEMA and (b) linear PDMAEMA (CDCl<sub>3</sub>, 600 MHz)

The <sup>1</sup>H NMR spectra of both polymers (Figure S1a, b) displayed peaks for α-methyl groups and methylene groups in the methacrylate backbone at δ = 0.8–1.1 ppm (a) and 1.7–2.0 ppm (b), respectively. Proton signals from the methylene groups in pendant chains were found at δ = 2.5–2.6 ppm (d) and δ = 4.0–4.3 ppm (e), and signals from the methyl protons of the amino group were at δ = 2.2–2.4 ppm (c). Additionally, on star spectra are visible signals corresponding to the aromatic protons of the core in the range of 7.0–7.5 ppm (inset Figure S1a).

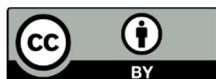

© 2020 by the authors. Submitted for possible open access publication under the terms and conditions of the Creative Commons Attribution (CC BY) license (<http://creativecommons.org/licenses/by/4.0/>).
